# Supplementary material for: Serum Adipokines, Growth Factors, and Cytokines Are Independently Associated with Stunting in Bangladeshi Children
Source: PubMed Central journal article supplement (PMC6723106; doi:10.3390/nu11081827), 2019-08-07
Supplement: nutrients-11-01827-s001.pdf [file nutrients-11-01827-s001.pdf]

Supplementary File

Table S1: Spearman correlation between different biomarkers at enrolment in stunted children

| At enrolment  | AAT   | MPO   | NEO   | Ghrelin | Leptin | Adiponectin | OXM   | GLP-1 | GLP-2 | IGF-1 | FGF-19 | FGF-21 | IL-1B | IL-4  | IL-6  | IL-10 | IL-12 | TNF  | IFN- $\gamma$ | CRP  |  |
|---------------|-------|-------|-------|---------|--------|-------------|-------|-------|-------|-------|--------|--------|-------|-------|-------|-------|-------|------|---------------|------|--|
| AAT           | 1.00  |       |       |         |        |             |       |       |       |       |        |        |       |       |       |       |       |      |               |      |  |
| MPO           | 0.16  | 1.00  |       |         |        |             |       |       |       |       |        |        |       |       |       |       |       |      |               |      |  |
| NEO           | 0.12  | -0.02 | 1.00  |         |        |             |       |       |       |       |        |        |       |       |       |       |       |      |               |      |  |
| Ghrelin       | 0.14  | 0.24  | -0.09 | 1.00    |        |             |       |       |       |       |        |        |       |       |       |       |       |      |               |      |  |
| Leptin        | 0.23  | -0.08 | -0.08 | 0.08    | 1.00   |             |       |       |       |       |        |        |       |       |       |       |       |      |               |      |  |
| Adiponectin   | 0.24  | 0.04  | 0.02  | 0.09    | 0.27   | 1.00        |       |       |       |       |        |        |       |       |       |       |       |      |               |      |  |
| OXM           | 0.14  | -0.01 | 0.20  | 0.16    | -0.08  | 0.05        | 1.00  |       |       |       |        |        |       |       |       |       |       |      |               |      |  |
| GLP-1         | -0.01 | -0.01 | 0.22  | 0.04    | 0.12   | 0.02        | 0.39  | 1.00  |       |       |        |        |       |       |       |       |       |      |               |      |  |
| GLP-2         | 0.00  | 0.34  | 0.15  | 0.00    | -0.18  | -0.05       | 0.17  | -0.02 | 1.00  |       |        |        |       |       |       |       |       |      |               |      |  |
| IGF-1         | 0.12  | -0.04 | 0.16  | -0.01   | 0.34   | 0.01        | 0.15  | 0.33  | 0.01  | 1.00  |        |        |       |       |       |       |       |      |               |      |  |
| FGF-19        | -0.02 | 0.11  | -0.25 | 0.07    | 0.10   | -0.04       | -0.04 | -0.10 | -0.11 | -0.13 | 1.00   |        |       |       |       |       |       |      |               |      |  |
| FGF-21        | -0.04 | 0.04  | -0.06 | -0.06   | -0.25  | -0.01       | 0.11  | 0.06  | 0.19  | -0.20 | 0.08   | 1.00   |       |       |       |       |       |      |               |      |  |
| IL-1B         | 0.23  | 0.08  | 0.12  | 0.12    | 0.02   | 0.31        | -0.03 | 0.08  | -0.29 | 0.02  | -0.04  | -0.26  | 1.00  |       |       |       |       |      |               |      |  |
| IL-4          | 0.24  | 0.05  | 0.38  | 0.10    | 0.04   | 0.18        | 0.41  | 0.39  | 0.01  | 0.25  | -0.28  | 0.04   | 0.17  | 1.00  |       |       |       |      |               |      |  |
| IL-6          | 0.14  | 0.03  | 0.03  | 0.22    | -0.12  | 0.17        | 0.48  | 0.44  | 0.07  | 0.34  | -0.15  | -0.04  | 0.12  | 0.49  | 1.00  |       |       |      |               |      |  |
| IL-10         | 0.23  | -0.14 | 0.01  | 0.20    | -0.10  | 0.08        | 0.15  | 0.08  | 0.11  | 0.06  | -0.09  | 0.32   | -0.02 | 0.45  | 0.32  | 1.00  |       |      |               |      |  |
| IL-12         | 0.16  | 0.07  | 0.35  | 0.23    | 0.00   | 0.04        | 0.43  | 0.53* | 0.12  | 0.39  | -0.20  | -0.10  | 0.20  | 0.59* | 0.52* | 0.16  | 1.00  |      |               |      |  |
| TNF           | 0.16  | -0.14 | 0.07  | 0.23    | -0.17  | -0.13       | -0.11 | -0.28 | 0.28  | -0.11 | -0.09  | 0.22   | -0.22 | 0.12  | 0.06  | 0.62* | 0.01  | 1.00 |               |      |  |
| IFN- $\gamma$ | -0.01 | -0.25 | -0.06 | 0.00    | -0.31  | 0.07        | 0.02  | 0.17  | 0.00  | -0.21 | -0.26  | 0.22   | 0.02  | 0.01  | 0.16  | 0.36  | -0.03 | 0.27 | 1.00          |      |  |
| CRP           | -0.07 | 0.13  | 0.04  | 0.11    | -0.30  | 0.01        | 0.11  | 0.05  | 0.09  | -0.16 | -0.08  | -0.24  | 0.13  | 0.34  | 0.46  | 0.30  | 0.08  | 0.18 | 0.13          | 1.00 |  |

Data are analyzed by Spearman's rank correlation coefficient or Spearman's rho or  $\rho$ : \* $p < 0.05$ . All estimates are sera based. Abbreviation: AAT: alpha-1 antitrypsin; CRP: C-reactive protein; FGF: fibroblast growth factor; IFN- $\gamma$ : gamma interferon; GLP: glucagon-like peptide; IL: interleukins; IGF: insulin-like growth factor; MPO: myeloperoxidase; NEO: neopterin; OXM: oxymodulin; TNF- $\alpha$ : tumor necrosis factor alpha.

Table S2: Spearman correlation between different biomarkers at 6-month post-enrolment in stunted children

| At 6-month post-enrolment | AAT   | MPO   | NEO   | Ghrelin | Leptin | Adiponectin | OXM   | GLP-1 | GLP-2 | IGF-1 | FGF-19 | FGF-21 | IL-1B | IL-4  | IL-6  | IL-10 | IL-12 | TNF  | IFN- $\gamma$ | CRP  |  |
|---------------------------|-------|-------|-------|---------|--------|-------------|-------|-------|-------|-------|--------|--------|-------|-------|-------|-------|-------|------|---------------|------|--|
| AAT                       | 1.00  |       |       |         |        |             |       |       |       |       |        |        |       |       |       |       |       |      |               |      |  |
| MPO                       | -0.09 | 1.00  |       |         |        |             |       |       |       |       |        |        |       |       |       |       |       |      |               |      |  |
| NEO                       | 0.10  | -0.06 | 1.00  |         |        |             |       |       |       |       |        |        |       |       |       |       |       |      |               |      |  |
| Ghrelin                   | 0.17  | 0.09  | 0.02  | 1.00    |        |             |       |       |       |       |        |        |       |       |       |       |       |      |               |      |  |
| Leptin                    | -0.13 | 0.06  | -0.25 | -0.01   | 1.00   |             |       |       |       |       |        |        |       |       |       |       |       |      |               |      |  |
| Adiponectin               | -0.08 | 0.15  | 0.13  | 0.01    | 0.26   | 1.00        |       |       |       |       |        |        |       |       |       |       |       |      |               |      |  |
| OXM                       | -0.04 | 0.11  | -0.01 | 0.20    | 0.12   | -0.25       | 1.00  |       |       |       |        |        |       |       |       |       |       |      |               |      |  |
| GLP-1                     | 0.18  | -0.29 | 0.55  | -0.17   | -0.19  | 0.14        | -0.10 | 1.00  |       |       |        |        |       |       |       |       |       |      |               |      |  |
| GLP-2                     | 0.02  | 0.07  | 0.22  | -0.33   | 0.17   | 0.08        | -0.09 | 0.18  | 1.00  |       |        |        |       |       |       |       |       |      |               |      |  |
| IGF-1                     | -0.10 | -0.38 | -0.13 | 0.12    | 0.30   | 0.11        | 0.09  | 0.10  | -0.12 | 1.00  |        |        |       |       |       |       |       |      |               |      |  |
| FGF-19                    | 0.31  | 0.21  | -0.05 | -0.04   | -0.04  | 0.10        | 0.05  | 0.10  | -0.05 | -0.28 | 1.00   |        |       |       |       |       |       |      |               |      |  |
| FGF-21                    | 0.20  | -0.10 | -0.24 | 0.17    | -0.12  | -0.41       | -0.02 | -0.23 | -0.08 | -0.23 | 0.24   | 1.00   |       |       |       |       |       |      |               |      |  |
| IL-1B                     | -0.05 | 0.02  | 0.02  | 0.23    | 0.13   | 0.09        | 0.32  | -0.12 | -0.19 | 0.00  | -0.22  | 0.20   | 1.00  |       |       |       |       |      |               |      |  |
| IL-4                      | 0.13  | -0.13 | -0.07 | 0.17    | -0.09  | -0.05       | 0.02  | 0.01  | -0.20 | -0.02 | 0.13   | 0.32   | -0.09 | 1.00  |       |       |       |      |               |      |  |
| IL-6                      | 0.00  | -0.01 | -0.09 | 0.17    | -0.01  | 0.01        | -0.04 | -0.11 | 0.08  | -0.07 | -0.15  | 0.14   | 0.22  | 0.14  | 1.00  |       |       |      |               |      |  |
| IL-10                     | 0.14  | 0.30  | 0.12  | -0.14   | -0.25  | -0.25       | -0.08 | 0.17  | 0.22  | -0.38 | -0.04  | 0.03   | -0.08 | 0.02  | 0.42  | 1.00  |       |      |               |      |  |
| IL-12                     | -0.46 | 0.20  | 0.05  | -0.04   | 0.30   | 0.10        | -0.12 | 0.13  | 0.15  | 0.29  | -0.54  | -0.29  | 0.18  | -0.18 | 0.06  | 0.14  | 1.00  |      |               |      |  |
| TNF                       | -0.04 | 0.27  | 0.05  | -0.09   | -0.05  | 0.04        | -0.06 | -0.02 | 0.19  | 0.06  | -0.20  | 0.06   | 0.12  | 0.07  | 0.10  | 0.17  | 0.25  | 1.00 |               |      |  |
| IFN- $\gamma$             | 0.00  | 0.18  | 0.06  | 0.08    | 0.02   | 0.00        | -0.03 | 0.05  | -0.02 | -0.06 | -0.35  | -0.07  | 0.06  | -0.13 | 0.20  | 0.30  | 0.41  | 0.32 | 1.00          |      |  |
| CRP                       | 0.04  | 0.15  | -0.16 | 0.30    | -0.24  | -0.17       | 0.12  | -0.11 | -0.17 | -0.24 | -0.06  | 0.24   | 0.20  | 0.24  | 0.58* | 0.35  | -0.05 | 0.03 | -0.11         | 1.00 |  |

Data are analyzed by Spearman's rank correlation coefficient or Spearman's rho or  $\rho$ ; \* $p < 0.05$ . All estimates are sera based. Abbreviation: AAT: alpha-1 antitrypsin; CRP: C-reactive protein; FGF: fibroblast growth factor; IFN- $\gamma$ : gamma interferon; GLP: glucagon-like peptide; IL: interleukins; IGF: insulin-like growth factor; MPO: myeloperoxidase; NEO: neopterin; OXM: oxyntomodulin; TNF- $\alpha$ : tumor necrosis factor alpha.

Table S3: Spearman correlation between different biomarkers at enrolment in control children

| At enrolment  | AAT   | MPO   | NEO   | Ghrelin | Leptin | Adiponectin | OXM   | GLP-1 | GLP-2 | IGF-1 | FGF-19 | FGF-21 | IL-1B | IL-4  | IL-6 | IL-10 | IL-12 | TNF   | IFN- $\gamma$ | CRP  |  |
|---------------|-------|-------|-------|---------|--------|-------------|-------|-------|-------|-------|--------|--------|-------|-------|------|-------|-------|-------|---------------|------|--|
| AAT           | 1.00  |       |       |         |        |             |       |       |       |       |        |        |       |       |      |       |       |       |               |      |  |
| MPO           | 0.12  | 1.00  |       |         |        |             |       |       |       |       |        |        |       |       |      |       |       |       |               |      |  |
| NEO           | -0.09 | 0.19  | 1.00  |         |        |             |       |       |       |       |        |        |       |       |      |       |       |       |               |      |  |
| Ghrelin       | -0.20 | 0.07  | 0.34  | 1.00    |        |             |       |       |       |       |        |        |       |       |      |       |       |       |               |      |  |
| Leptin        | 0.11  | -0.30 | -0.12 | -0.06   | 1.00   |             |       |       |       |       |        |        |       |       |      |       |       |       |               |      |  |
| Adiponectin   | -0.42 | -0.26 | -0.08 | 0.03    | 0.08   | 1.00        |       |       |       |       |        |        |       |       |      |       |       |       |               |      |  |
| OXM           | 0.31  | -0.13 | -0.08 | -0.02   | 0.83*  | -0.44       | 1.00  |       |       |       |        |        |       |       |      |       |       |       |               |      |  |
| GLP-1         | -0.12 | 0.29  | 0.00  | 0.22    | 0.01   | 0.04        | 0.01  | 1.00  |       |       |        |        |       |       |      |       |       |       |               |      |  |
| GLP-2         | 0.01  | -0.19 | 0.31  | 0.34    | 0.00   | -0.03       | 0.08  | 0.16  | 1.00  |       |        |        |       |       |      |       |       |       |               |      |  |
| IGF-1         | -0.09 | 0.07  | -0.05 | -0.12   | -0.20  | 0.38        | -0.36 | 0.23  | 0.03  | 1.00  |        |        |       |       |      |       |       |       |               |      |  |
| FGF-19        | -0.05 | -0.11 | 0.11  | 0.02    | 0.55*  | 0.02        | 0.48  | 0.05  | 0.11  | -0.02 | 1.00   |        |       |       |      |       |       |       |               |      |  |
| FGF-21        | -0.23 | 0.28  | 0.16  | 0.01    | -0.43  | 0.01        | -0.39 | -0.12 | -0.06 | -0.17 | -0.17  | 1.00   |       |       |      |       |       |       |               |      |  |
| IL-1B         | 0.15  | 0.21  | -0.11 | 0.07    | 0.04   | 0.01        | 0.03  | 0.13  | 0.06  | -0.21 | -0.22  | -0.03  | 1.00  |       |      |       |       |       |               |      |  |
| IL-4          | -0.02 | 0.01  | 0.16  | 0.18    | -0.06  | -0.11       | 0.04  | -0.01 | 0.13  | -0.42 | -0.02  | 0.19   | 0.32  | 1.00  |      |       |       |       |               |      |  |
| IL-6          | -0.03 | -0.07 | 0.04  | 0.10    | 0.00   | 0.08        | 0.00  | 0.27  | 0.23  | -0.14 | 0.06   | 0.08   | 0.00  | 0.14  | 1.00 |       |       |       |               |      |  |
| IL-10         | -0.03 | 0.10  | 0.08  | 0.32    | -0.10  | -0.11       | 0.01  | 0.11  | 0.16  | 0.19  | 0.04   | -0.02  | -0.16 | -0.01 | 0.00 | 1.00  |       |       |               |      |  |
| IL-12         | 0.13  | 0.29  | 0.19  | 0.10    | -0.10  | -0.02       | -0.09 | 0.22  | 0.18  | 0.18  | -0.07  | 0.00   | 0.03  | 0.13  | 0.11 | 0.30  | 1.00  |       |               |      |  |
| TNF           | -0.09 | 0.00  | 0.14  | 0.09    | -0.11  | -0.15       | -0.04 | 0.19  | 0.27  | -0.01 | 0.16   | 0.11   | -0.08 | 0.06  | 0.23 | -0.10 | 0.09  | 1.00  |               |      |  |
| IFN- $\gamma$ | 0.11  | 0.24  | 0.13  | 0.22    | 0.06   | -0.02       | 0.10  | 0.40  | 0.11  | 0.12  | -0.02  | -0.05  | 0.31  | 0.20  | 0.13 | 0.02  | 0.42  | -0.15 | 1.00          |      |  |
| CRP           | -0.02 | 0.04  | 0.36  | 0.11    | -0.27  | 0.17        | -0.39 | 0.11  | -0.06 | 0.08  | -0.31  | 0.15   | 0.00  | 0.11  | 0.18 | -0.10 | 0.34  | 0.00  | 0.16          | 1.00 |  |

Data are analyzed by Spearman's rank correlation coefficient or Spearman's rho or  $\rho$ : \* $p < 0.05$ . All estimates are sera based. Abbreviation: AAT: alpha-1 antitrypsin; CRP: C-reactive protein; FGF: fibroblast growth factor; IFN- $\gamma$ : gamma interferon; GLP: glucagon-like peptide; IL: interleukins; IGF: insulin-like growth factor; MPO: myeloperoxidase; NEO: neopterin; OXM: oxyntomodulin; TNF- $\alpha$ : tumor necrosis factor alpha.

Table S4: Spearman correlation between different biomarkers at 6-month post-enrolment in control children

| At 6-month post-enrolment | AAT   | MPO   | NEO   | Ghrelin | Leptin | Adiponectin | OXM   | GLP-1 | GLP-2 | IGF-1 | FGF-19 | FGF-21 | IL-1B | IL-4  | IL-6  | IL-10 | IL-12 | TNF  | IFN- $\gamma$ | CRP  |  |
|---------------------------|-------|-------|-------|---------|--------|-------------|-------|-------|-------|-------|--------|--------|-------|-------|-------|-------|-------|------|---------------|------|--|
| AAT                       | 1.00  |       |       |         |        |             |       |       |       |       |        |        |       |       |       |       |       |      |               |      |  |
| MPO                       | 0.02  | 1.00  |       |         |        |             |       |       |       |       |        |        |       |       |       |       |       |      |               |      |  |
| NEO                       | 0.24  | 0.16  | 1.00  |         |        |             |       |       |       |       |        |        |       |       |       |       |       |      |               |      |  |
| Ghrelin                   | 0.29  | 0.24  | 0.39  | 1.00    |        |             |       |       |       |       |        |        |       |       |       |       |       |      |               |      |  |
| Leptin                    | -0.11 | 0.13  | 0.20  | 0.23    | 1.00   |             |       |       |       |       |        |        |       |       |       |       |       |      |               |      |  |
| Adiponectin               | 0.01  | -0.12 | -0.16 | 0.17    | -0.25  | 1.00        |       |       |       |       |        |        |       |       |       |       |       |      |               |      |  |
| OXM                       | -0.15 | 0.17  | 0.09  | -0.02   | 0.81*  | -0.65       | 1.00  |       |       |       |        |        |       |       |       |       |       |      |               |      |  |
| GLP-1                     | 0.56  | 0.17  | 0.29  | 0.07    | 0.19   | 0.09        | 0.08  | 1.00  |       |       |        |        |       |       |       |       |       |      |               |      |  |
| GLP-2                     | 0.09  | 0.22  | -0.10 | -0.22   | 0.11   | -0.33       | 0.39  | 0.29  | 1.00  |       |        |        |       |       |       |       |       |      |               |      |  |
| IGF-1                     | 0.04  | -0.08 | 0.27  | 0.28    | 0.07   | 0.30        | -0.20 | 0.18  | -0.12 | 1.00  |        |        |       |       |       |       |       |      |               |      |  |
| FGF-19                    | -0.22 | -0.18 | -0.12 | 0.19    | 0.05   | 0.18        | -0.12 | -0.07 | -0.26 | 0.07  | 1.00   |        |       |       |       |       |       |      |               |      |  |
| FGF-21                    | -0.07 | 0.02  | -0.24 | -0.52   | -0.17  | -0.36       | 0.07  | -0.34 | 0.27  | -0.31 | -0.04  | 1.00   |       |       |       |       |       |      |               |      |  |
| IL-1B                     | -0.05 | 0.11  | 0.18  | -0.27   | 0.23   | -0.20       | 0.34  | -0.13 | -0.03 | -0.66 | -0.24  | 0.15   | 1.00  |       |       |       |       |      |               |      |  |
| IL-4                      | -0.17 | -0.40 | 0.11  | -0.22   | 0.00   | 0.35        | -0.27 | -0.12 | -0.10 | 0.21  | 0.12   | 0.34   | 0.01  | 1.00  |       |       |       |      |               |      |  |
| IL-6                      | 0.07  | -0.04 | 0.18  | -0.47   | -0.32  | -0.14       | -0.19 | 0.19  | -0.14 | -0.16 | -0.06  | 0.35   | 0.15  | 0.19  | 1.00  |       |       |      |               |      |  |
| IL-10                     | 0.35  | 0.08  | 0.13  | 0.35    | 0.00   | -0.19       | -0.04 | 0.06  | 0.02  | 0.28  | 0.03   | -0.09  | -0.26 | -0.13 | -0.27 | 1.00  |       |      |               |      |  |
| IL-12                     | -0.09 | 0.07  | 0.45  | 0.24    | 0.22   | -0.14       | 0.06  | 0.08  | 0.01  | 0.16  | 0.14   | -0.08  | 0.12  | 0.23  | -0.20 | 0.41  | 1.00  |      |               |      |  |
| TNF                       | -0.42 | -0.11 | 0.11  | -0.25   | 0.22   | -0.10       | 0.22  | -0.02 | 0.17  | 0.22  | 0.00   | 0.21   | -0.02 | 0.48  | 0.15  | 0.07  | 0.41  | 1.00 |               |      |  |
| IFN- $\gamma$             | -0.26 | 0.26  | -0.08 | 0.03    | 0.06   | 0.48        | -0.19 | 0.09  | -0.09 | 0.48  | -0.02  | 0.01   | -0.29 | 0.43  | 0.00  | -0.06 | 0.16  | 0.42 | 1.00          |      |  |
| CRP                       | -0.08 | 0.10  | 0.27  | -0.01   | -0.31  | 0.23        | -0.49 | -0.15 | -0.10 | 0.23  | 0.13   | 0.19   | -0.02 | 0.41  | 0.29  | 0.20  | 0.47  | 0.15 | 0.30          | 1.00 |  |

Data are analyzed by Spearman's rank correlation coefficient or Spearman's rho or  $\rho$ : \* $p < 0.05$ . All estimates are sera based. Abbreviation: AAT: alpha-1 antitrypsin; CRP: C-reactive protein; FGF: fibroblast growth factor; IFN- $\gamma$ : gamma interferon; GLP: glucagon-like peptide; IL: interleukins; IGF: insulin-like growth factor; MPO: myeloperoxidase; NEO: neopterin; OXM: oxyntomodulin; TNF- $\alpha$ : tumor necrosis factor alpha.
